# Supplementary material
Source: Springer Nature journal article supplement (https://www.springermedizin.de/resource/supplementary/13031_2011_87_MOESM2_ESM.pdf/9645074)

### A. Under Five Mortality, Africa

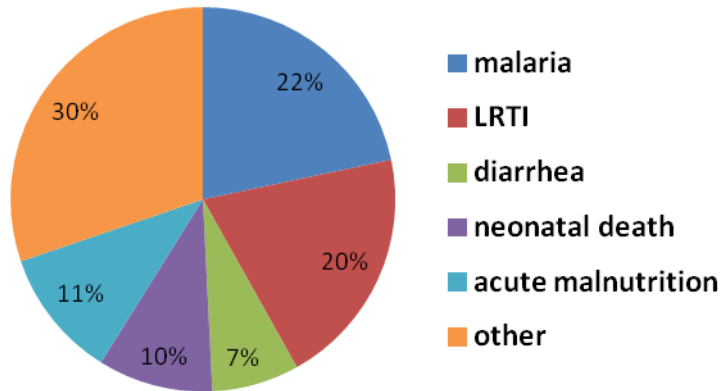

### B. Under Five Mortality, Asia

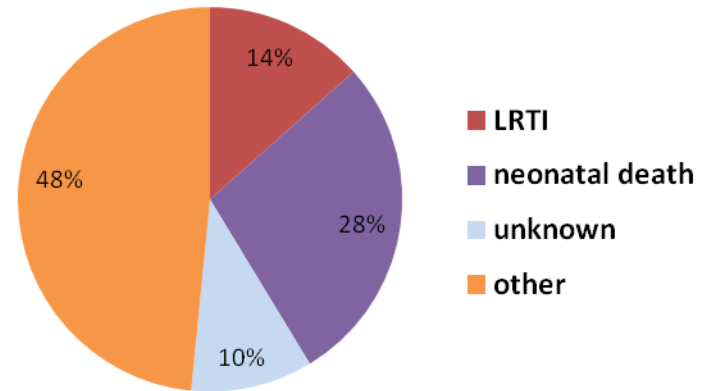

### C. Under Five Morbidity, Africa

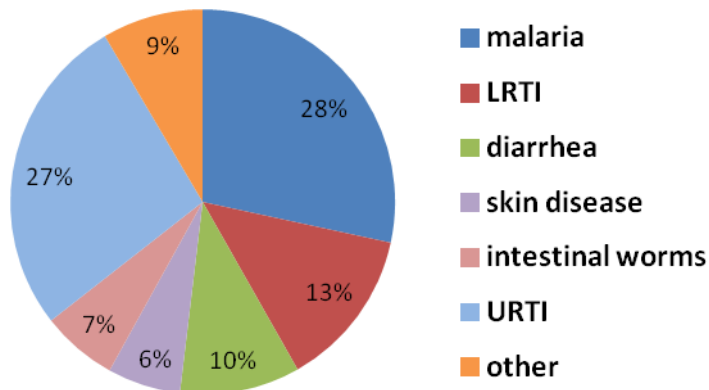

### D. Under Five Morbidity, Asia

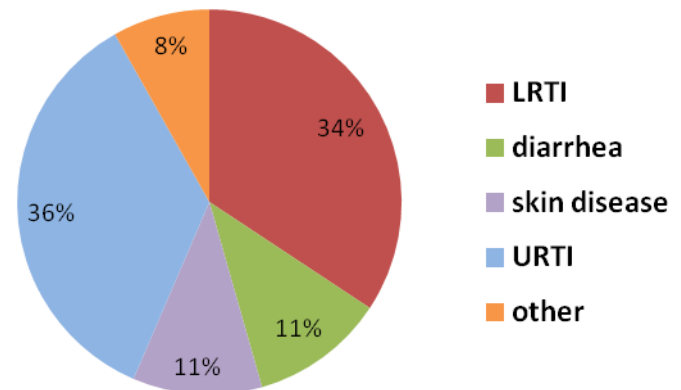

Supplement: MOESM2 [file 9645074]
